# Supplementary material for: Evidence of constant diversification punctuated by a mass extinction in the African cycads
Source: PubMed Central journal article supplement (PMC3894887; doi:10.1002/ece3.880), 2013-12-11

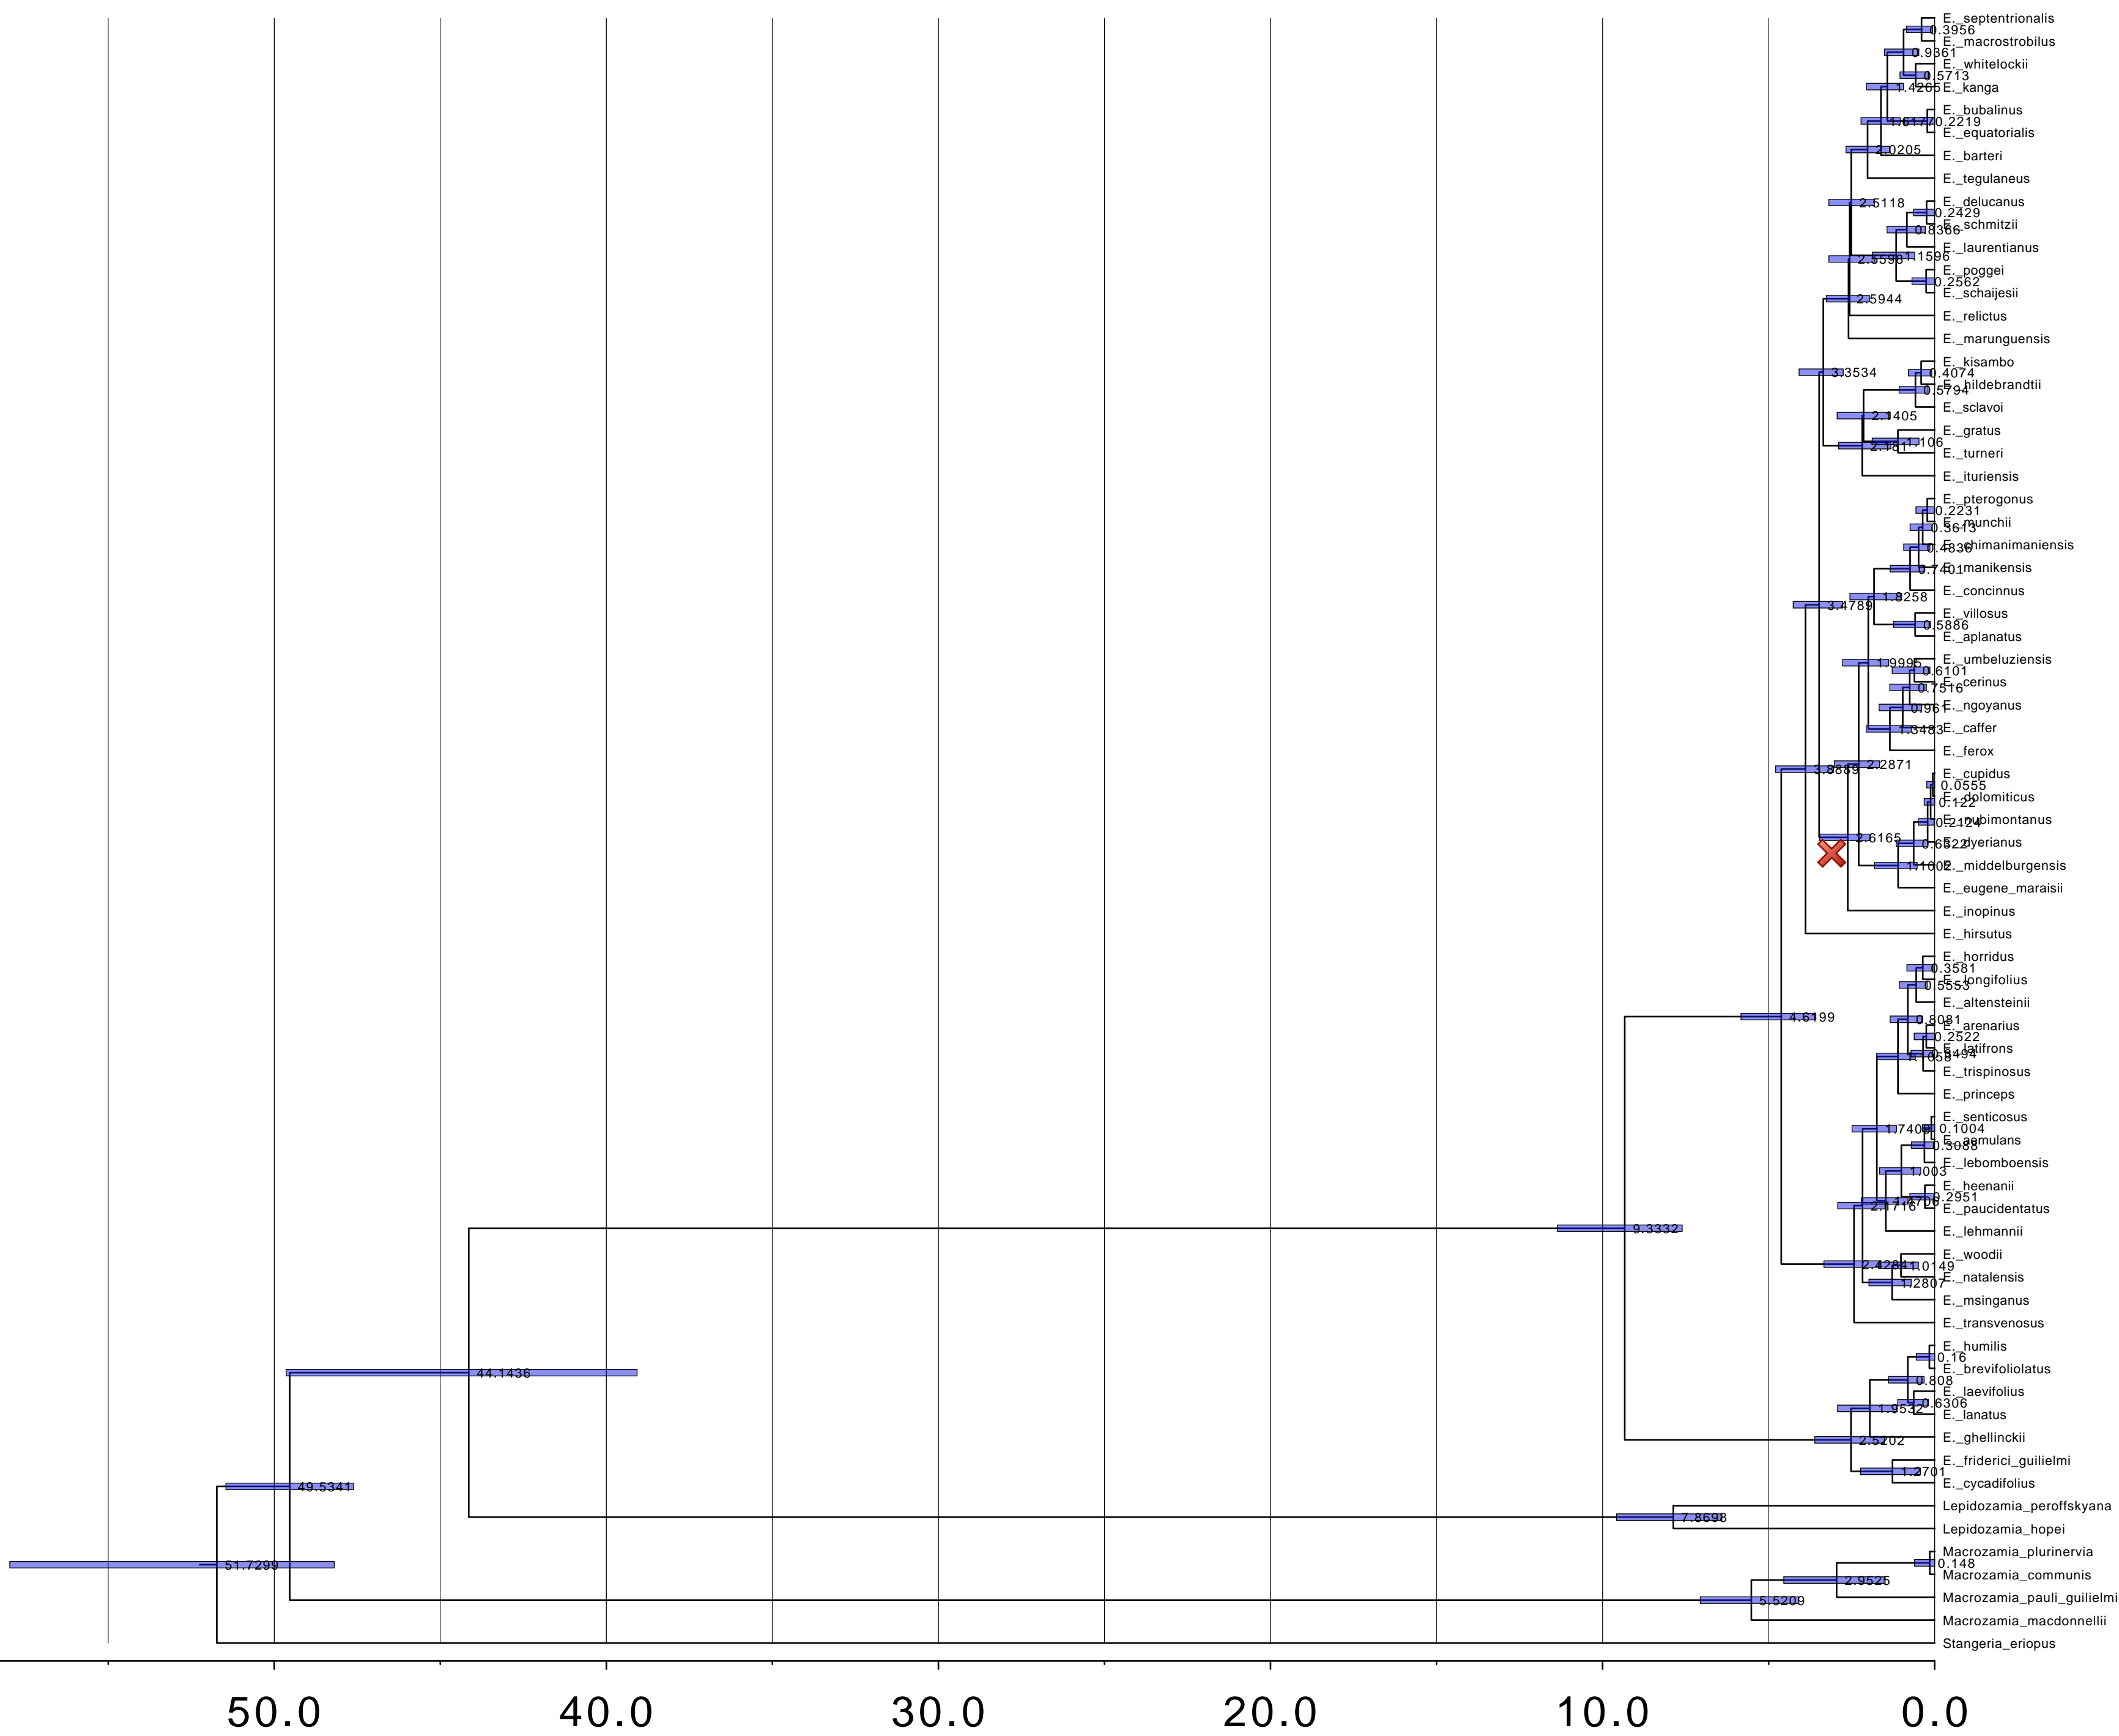

Supplement: ece30004-0050-SD1.pdf [file ece30004-0050-SD1.pdf]
